# Supplementary material
Source: publisher site journal article supplement (https://www.dovepress.com/article/340587)
Supplement: Supplementary file 1 [file get_supplementary_file.php]

**Table S1. Quality assessment (Readmission).**

| **Author (year)** | **Sample**  **design** | **Sample**  **frame** | **Sample**  **size (n)** | **Measures** | **Unbiased**  **assessors** | **Response rate and refusers** | **Prevalence**  **rates** | **Study subjects described** | **Total score** |
| --- | --- | --- | --- | --- | --- | --- | --- | --- | --- |
| Aizawa H 20151 | * | * | * | * | - | - | - | * | 5 |
| Babayan ZV 20032 | * | * | * | * | - | - | - | * | 5 |
| Bradford C 20163 | * | * | * | * | - | * | - | * | 6 |
| Corrao G 20154 | * | * | * | * | - | - | - | * | 5 |
| Dai S 20165 | * | * | * | * | - | - | - | * | 5 |
| Fernandez-Gasso L 20176 | * | * | * | * | - | - | - | * | 5 |
| Golas SB 20187 | * | * | * | * | - | - | - | * | 5 |
| Harikrishnan S 20178 | * | * | * | * | - | - | - | * | 5 |
| Leong KT 20079 | * | * | - | * | - | * | - | * | 5 |
| Mavrea AM 201510 | * | * | * | * | - | * | - | * | 6 |
| Mclaren DP 201611 | * | * | * | * | - | - | - | * | 5 |
| Reynolds K 201512 | * | * | * | * | - | - | - | * | 5 |
| Sterling MR 201813 | * | * | * | * | - | * | - | * | 6 |
| Tuppin P 201314 | * | * | * | * | - | - | - | * | 5 |
| Whittaker BD 201415 | * | * | * | * | - | * | - | * | 6 |
| Wiley JF 201716 | * | * | * | * | - | * | - | * | 6 |

Notes: Each * represents 1 point.

**Table S2. Quality assessment (Mortality).**

| **Author (year)** | **Sample**  **design** | **Sample**  **frame** | **Sample**  **size (n)** | **Measures** | **Unbiased**  **assessors** | **Response rate and refusers** | **Prevalence**  **rates** | **Study subjects described** | **Total score** |
| --- | --- | --- | --- | --- | --- | --- | --- | --- | --- |
| Arenja N 201117 | * | - | * | * | * | * | - | * | 6 |
| Chaudhry SI 201018 | * | * | * | - | * | - | - | * | 5 |
| Choi DJ 201119 | * | * | * | * | - | * | - | * | 6 |
| Coles AH 201520 | * | * | * | * | - | - | - | * | 5 |
| Corrao G 20154 | * | * | * | * | - | - | - | * | 5 |
| Costa D 201821 | * | * | - | * | - | - | - | * | 4 |
| Eapen ZJ 201322 | * | * | * | * | - | - | - | * | 5 |
| Formiga F 201823 | * | * | * | * | - | * | -- | * | 5 |
| Harikrishnan S 20178 | * | * | * | * | - | - | - | * | 5 |
| Mwita JC 201724 | * | * | - | * | - | * | - | * | 5 |
| Rudiger A 200525 | * | * | * | * | - | * | - | * | 6 |
| Siirila-Waris K 200626 | * | * | * | * | - | - | - | * | 5 |
| Stampehl M 201927 | * | * | * | * | - | - | - | * | 5 |

Notes: Each * represents 1 point.

**Table S3. Subgroup analysis for 30-day readmission after heart failure.**

| **Items** | **NO. of studies** | **Pooled rate with 95%CI** | ***I2* (%)** |
| --- | --- | --- | --- |
| Region |  |  |  |
| Non-America | 5 | 0.15 [0.08, 0.21] | 100 |
| America | 6 | 0.22 [0.15, 0.28] | 99 |
| Sample size |  |  |  |
| <10000 | 6 | 0.21 [0.18, 0.24] | 89 |
| >10000 | 5 | 0.16 [0.09, 0.23] | 100 |
| Quality of included studies |  |  |  |
| ≥ 6 | 4 | 0.22 [0.16, 0.27] | 93 |
| < 6 | 7 | 0.17 [0.11, 0.23] | 97.8 |

Abbreviations: CI: confidence interval.

**Table S4. Subgroup analysis for 1-year readmission after heart failure.**

| **Items** | **NO. of studies** | **Pooled rate with 95%CI** | ***I2* (%)** |
| --- | --- | --- | --- |
| Region |  |  |  |
| Non-America | 4 | 0.50 [0.31, 0.68] | 99 |
| America | 2 | 0.59 [0.56, 0.62] | 56 |
| Sample size |  |  |  |
| <10000 | 4 | 0.49 [0.30, 0.69] | 98 |
| >10000 | 2 | 0.59 [0.56, 0.61] | 96 |
|  |  |  |  |
| Quality of included studies |  |  |  |
| ≥6 | 1 | 0.65 [0.58, 0.72] | **-** |
| <6 | 5 | 0.50 [0.42, 0.58] | 99 |

Abbreviations: CI: confidence interval.

**Table S5. Subgroup analysis for 30-day mortality after heart failure.**

| **Items** | **NO. of studies** | **Pooled rate with 95%CI** | ***I2* (%)** |
| --- | --- | --- | --- |
| Region |  |  |  |
| Non-America | 4 | 0.10 [0.05, 0.14] | 95 |
| America | 3 | 0.12 [0.06, 0.19] | 100 |
| Sample size |  |  |  |
| <10000 | 3 | 0.11 [0.09, 0.12] | 23 |
| >10000 | 4 | 0.10 [0.05, 0.15] | 100 |
| Quality of included studies |  |  |  |
| ≥6 | 1 | 0.11 [0.07, 0.14] | **-** |
| <6 | 6 | 0.11 [0.07, 0.15] | 100 |

Abbreviations: CI: confidence interval.

**Table S6. Subgroup analysis for 1-year mortality after heart failure.**

| **Items** | **NO. of studies** | **Pooled rate with 95%CI** | ***I2* (%)** |
| --- | --- | --- | --- |
| Region |  |  |  |
| Non-America | 8 | 0.28 [0.25, 0.32] | 95 |
| America | 2 | 0.31 [0.31, 0.31] | 0 |
| Sample size |  |  |  |
| <10000 | 8 | 0.30 [0.25, 0.34] | 96 |
| >10000 | 2 | 0.27 [0.19, 0.35] | 100 |
| Quality of included studies |  |  |  |
| ≥6 | 3 | 0.27 [0.17, 0.37] | 96 |
| <6 | 7 | 0.30 [0.26, 0.34] | 99 |

Abbreviations: CI: confidence interval.

**References:**

1. Aizawa H, Imai S, Fushimi K. Factors associated with 30-day readmission of patients with heart failure from a Japanese administrative database. *BMC Cardiovasc Disord*. Oct 24 2015;15:134. doi:10.1186/s12872-015-0127-9

2. Babayan ZV, McNamara RL, Nagajothi N, et al. Predictors of cause-specific hospital readmission in patients with heart failure. *Clin Cardiol*. Sep 2003;26(9):411-8. doi:10.1002/clc.4960260906

3. Bradford C, Shah BM, Shane P, Wachi N, Sahota K. Patient and clinical characteristics that heighten risk for heart failure readmission. *Res Social Adm Pharm*. Nov 2017;13(6):1070-1081. doi:10.1016/j.sapharm.2016.11.002

4. Corrao G, Ghirardi A, Ibrahim B, Merlino L, Maggioni AP. Short- and long-term mortality and hospital readmissions among patients with new hospitalization for heart failure: A population-based investigation from Italy. *Int J Cardiol*. Feb 15 2015;181:81-7. doi:10.1016/j.ijcard.2014.12.004

5. Dai S, Manoucheri M, Gui J, et al. Kansas City Cardiomyopathy Questionnaire Utility in Prediction of 30-Day Readmission Rate in Patients with Chronic Heart Failure. *Cardiol Res Pract*. 2016;2016:4571201. doi:10.1155/2016/4571201

6. Fernandez-Gasso L, Hernando-Arizaleta L, Palomar-Rodríguez JA, Abellán-Pérez MV, Pascual-Figal DA. Trends, causes and timing of 30-day readmissions after hospitalization for heart failure: 11-year population-based analysis with linked data. *Int J Cardiol*. Dec 1 2017;248:246-251. doi:10.1016/j.ijcard.2017.07.094

7. Golas SB, Shibahara T, Agboola S, et al. A machine learning model to predict the risk of 30-day readmissions in patients with heart failure: a retrospective analysis of electronic medical records data. *BMC Med Inform Decis Mak*. Jun 22 2018;18(1):44. doi:10.1186/s12911-018-0620-z

8. Harikrishnan S, Sanjay G, Agarwal A, et al. One-year mortality outcomes and hospital readmissions of patients admitted with acute heart failure: Data from the Trivandrum Heart Failure Registry in Kerala, India. *Am Heart J*. Jul 2017;189:193-199. doi:10.1016/j.ahj.2017.03.019

9. Leong KT, Goh PP, Chang BC, Lingamanaicker J. Heart failure cohort in Singapore with defined criteria: clinical characteristics and prognosis in a multi-ethnic hospital-based cohort in Singapore. *Singapore Med J*. May 2007;48(5):408-14.

10. Mavrea AM, Dragomir T, Bordejevic DA, Tomescu MC, Ancusa O, Marincu I. Causes and predictors of hospital readmissions in patients older than 65 years hospitalized for heart failure with preserved left ventricular ejection fraction in western Romania. *Clin Interv Aging*. 2015;10:979-90. doi:10.2147/cia.S83750

11. McLaren DP, Jones R, Plotnik R, et al. Prior hospital admission predicts thirty-day hospital readmission for heart failure patients. *Cardiol J*. 2016;23(2):155-62. doi:10.5603/CJ.a2016.0005

12. Reynolds K, Butler MG, Kimes TM, Rosales AG, Chan W, Nichols GA. Relation of Acute Heart Failure Hospital Length of Stay to Subsequent Readmission and All-Cause Mortality. *Am J Cardiol*. Aug 1 2015;116(3):400-5. doi:10.1016/j.amjcard.2015.04.052

13. Sterling MR, Safford MM, Goggins K, et al. Numeracy, Health Literacy, Cognition, and 30-Day Readmissions among Patients with Heart Failure. *J Hosp Med*. Mar 1 2018;13(3):145-151. doi:10.12788/jhm.2932

14. Tuppin P, Cuerq A, de Peretti C, et al. First hospitalization for heart failure in France in 2009: patient characteristics and 30-day follow-up. *Arch Cardiovasc Dis*. Nov 2013;106(11):570-85. doi:10.1016/j.acvd.2013.08.002

15. Whittaker BD, Soine LA, Errico KM. Patient and process factors associated with all-cause 30-day readmission among patients with heart failure. *J Am Assoc Nurse Pract*. Feb 2015;27(2):105-13. doi:10.1002/2327-6924.12123

16. Wiley JF, Chan YK, Ahamed Y, et al. Multimorbidity and the Risk of All-Cause 30-Day Readmission in the Setting of Multidisciplinary Management of Chronic Heart Failure: A Retrospective Analysis of 830 Hospitalized Patients in Australia. *J Cardiovasc Nurs*. Sep/Oct 2018;33(5):437-445. doi:10.1097/jcn.0000000000000391

17. Arenja N, Breidthardt T, Socrates T, et al. Risk stratification for 1-year mortality in acute heart failure: classification and regression tree analysis. *Swiss medical weekly*. 2011;141:w13259. doi:10.4414/smw.2011.13259

18. Chaudhry SI, Wang Y, Gill TM, Krumholz HM. Geriatric conditions and subsequent mortality in older patients with heart failure. *Journal of the American College of Cardiology*. Jan 26 2010;55(4):309-16. doi:10.1016/j.jacc.2009.07.066

19. Choi DJ, Han S, Jeon ES, et al. Characteristics, outcomes and predictors of long-term mortality for patients hospitalized for acute heart failure: a report from the korean heart failure registry. *Korean circulation journal*. Jul 2011;41(7):363-71. doi:10.4070/kcj.2011.41.7.363

20. Coles AH, Tisminetzky M, Yarzebski J, et al. Magnitude of and Prognostic Factors Associated With 1-Year Mortality After Hospital Discharge for Acute Decompensated Heart Failure Based on Ejection Fraction Findings. *Journal of the American Heart Association*. Dec 23 2015;4(12)doi:10.1161/jaha.115.002303

21. Costa D, Aladio M, Girado CA, Perez de la Hoz R, Sara Berensztein C. Frailty is independently associated with 1-year mortality after hospitalization for acute heart failure. *International journal of cardiology Heart & vasculature*. Dec 2018;21:103-106. doi:10.1016/j.ijcha.2018.10.004

22. Eapen ZJ, Liang L, Fonarow GC, et al. Validated, electronic health record deployable prediction models for assessing patient risk of 30-day rehospitalization and mortality in older heart failure patients. *JACC Heart Fail*. Jun 2013;1(3):245-51. doi:10.1016/j.jchf.2013.01.008

23. Formiga F, Moreno-Gonzalez R, Chivite D, et al. Sex differences in 1-year mortality risks in older patients experiencing a first acute heart failure hospitalization. *Geriatrics & gerontology international*. Mar 2019;19(3):184-188. doi:10.1111/ggi.13580

24. Mwita JC, Dewhurst MJ, Magafu MG, et al. Presentation and mortality of patients hospitalised with acute heart failure in Botswana. *Cardiovascular journal of Africa*. Mar/Apr 23 2017;28(2):112-117. doi:10.5830/cvja-2016-067

25. Rudiger A, Harjola VP, Muller A, et al. Acute heart failure: clinical presentation, one-year mortality and prognostic factors. *European journal of heart failure*. Jun 2005;7(4):662-70. doi:10.1016/j.ejheart.2005.01.014

26. Siirila-Waris K, Lassus J, Melin J, Peuhkurinen K, Nieminen MS, Harjola VP. Characteristics, outcomes, and predictors of 1-year mortality in patients hospitalized for acute heart failure. *European heart journal*. Dec 2006;27(24):3011-7. doi:10.1093/eurheartj/ehl407

27. Stampehl M, Friedman HS, Navaratnam P, Russo P, Park S, Obi EN. Risk assessment of post-discharge mortality among recently hospitalized Medicare heart failure patients with reduced or preserved ejection fraction. *Current medical research and opinion*. Sep 13 2019:1-10. doi:10.1080/03007995.2019.1662654
